# Supplementary material
Source: publisher figshare collection journal article supplement (https://tandf.figshare.com/ndownloader/files/21493851)
Supplement: Supplementary file 1 [file 21493851]

**SUPPLEMENTAL FIGURES AND TABLES**

**Supplemental Table 1**

Abbreviations: PSA – prostate specific antigen; TRUS – transrectal ultrasound guided; GG – gleason grade; LHS – left-hand side; RHS – right-hand side

**Supplemental Table 2A**

DMPs without a gene name denote lack of annotation in the EPIC array manifesto/ intergenic region. Abbreviations: DMPs – differentially methylated probes; US – urine sediment.

**Supplemental Table 2B**

DMPs without a gene name denote lack of annotation in the EPIC array manifesto/intergenic region. Abbreviations: DMPs – differentially methylated probes; US – urine sediment.

**Supplemental Figure 1**

**Quality control of study cohort. A,** Total DNA yields from tissue and liquid biopsies ranged from 10.6 ng (subject 1 MN biopsy DNA) to 1,615 ng (subject 4, tumor DNA) and are shown on a logarithmic scale. **B,** DNA samples were subjected to quality control by absolute quantification using quantitative real-time PCR (HB-313) and again following bisulfite conversion (HB-365). Dashed lines indicate mean values across the cohort for each of the two qPCR reactions, respectively. **C,** Principal component analysis graph of the four subjects reveals greatest variation within cohort stems from whether samples are prostate or non-prostate, followed by whether samples are tumor or non-tumor. Abbreviations: MN: matched normal, US: urine sediment.

**Supplemental Figure 2**

**Description of study cohort.** Study cohort of four men who presented with treatment-naïve metastatic prostate cancer. Peripheral blood and urine sediment were collected at time 0 months for DNA methylation analyses. Patients were followed-up to track their biochemical (PSA) responses to therapy. GnRH agonists (goserelin, triptorelin) and analogues (leuprolin) are shown in orange. AR antagonists (bicalutamide) are shown in blue. Radiotherapy is shown in yellow.

**Supplemental Figure 3**

**Manhattan plot of PCa DMPs**. Differentially methylated probes (DMPs) between tumor and MN, were obtained using EPIC array methylation values. Results are plotted as negative log10 transformed *P*-values. Odd chromosomes are in grey and even chromosomes in blue. A total of 32,452 DMPs exceed the significance threshold of 0.05 (red line).

**
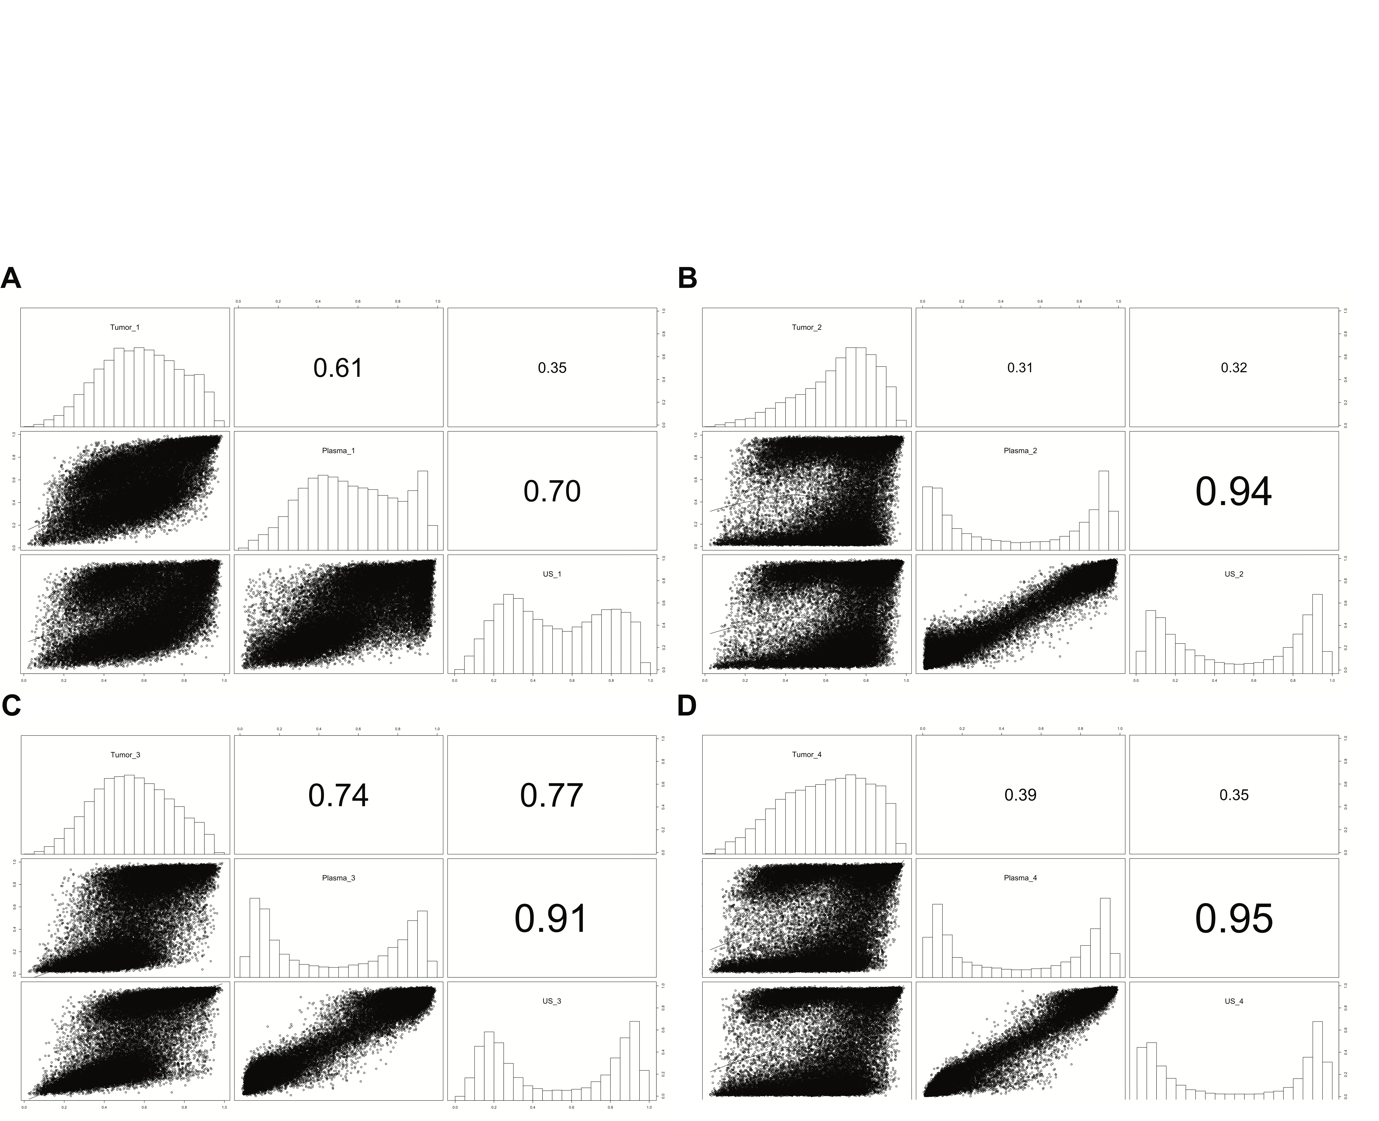
**

**Supplemental Figure 4**

**Spearman’s correlation matrix.** It shows DNA methylation profiles of matched tumor, plasma and US, for each individual subject, analyzedat the DMPs level (n=32,452). Each panel (A – D) corresponds to an individual subject (1-4) and shows a probe methylation scatter-plot (left hand-side), overall methylation distribution per sample (middle) and Spearman’s correlation values (upper hand-side). All values are statistically significant (*P*<0.001). Abbreviations: US – urine Sediment.

**Supplemental Figure 5**

**ZMIZ1 methylation detected across all sample types.** Schematic methylation map for a *ZMIZ1* tumor DMP (IlmnID: cg08058898) that was found to be picked up by the both plasma and US in all subjects. Gene structure and CpG islands (green) are indicated below the graph. Subjects methylation values are shown as a group in MN and tumor, and individually for Plasma and US. Abbreviations: DMP – Differentially methylated probe; MN – Matched normal; US – Urine Sediment.
